# Supplementary material for: Spatially clustered loci with multiple enhancers are frequent targets of HIV-1 integration
Source: PubMed Central journal article supplement (PMC6731298; doi:10.1038/s41467-019-12046-3), 2019-09-06
Supplement: 41467_2019_12046_MOESM3_ESM.pdf [file 41467_2019_12046_MOESM3_ESM.pdf]

**Description of Additional Supplementary Files**

File Name: Supplementary Data 1

Description: List of genes targeted by HIV-1
